# Supplementary material for: Synthesis of nano-sized LTL zeolite by addition of a Ba precursor with superior n-octane aromatization performance
Source: Royal Society of Chemistry journal article supplement (doi:10.1039/c8cy00661j), 2018-01-01
Supplement: c8cy00661j1.pdf [file c8cy00661j1.pdf]

## **Synthesis of nano-sized LTL zeolite by adding Ba precursor with superior n-octane aromatization performance**

Chunli Zhao<sup>a,b</sup>, Baoshan Wu<sup>a,c,\*</sup>, Zhichao Tao<sup>c</sup>, Ke Li<sup>a,b</sup>, Tao Li<sup>a,b</sup>, Xiang Gao<sup>a,b</sup>,  
Lihua Huang<sup>c</sup>, Yifeng Yun<sup>c,\*</sup>, Yong Yang<sup>a,c,\*</sup>, Yongwang Li<sup>a,c</sup>

<sup>a</sup> *State Key Laboratory of Coal Conversion, Institute of Coal Chemistry, Chinese Academy of Sciences, Taiyuan 030001, P.R. China*

<sup>b</sup> *University of Chinese Academy of Sciences, Beijing 100049, P.R. China*

<sup>c</sup> *National Energy Research Center for Clean fuels, Synfuels China Co., Ltd., Beijing 101400, P.R. China*

**\*Corresponding Author:** *State Key Laboratory of Coal Conversion, Institute of Coal Chemistry, Chinese Academy of Sciences, Taiyuan 030001, P.R. China*

E-mail: yyong@sxicc.ac.cn (Y. Yang);

wbs@sxicc.ac.cn (B.S. Wu);

yunyifeng@synfuelschina.com.cn (Y.F. Yun);

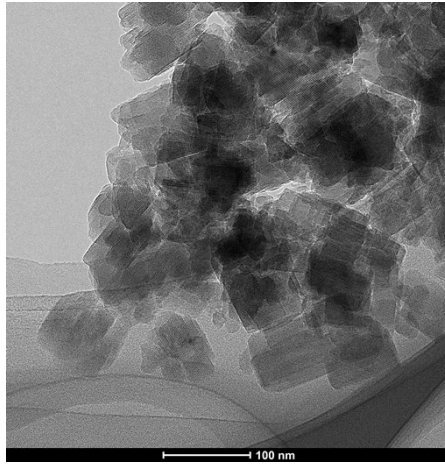

**Fig.S1.** TEM image of Sample BaKL-3.

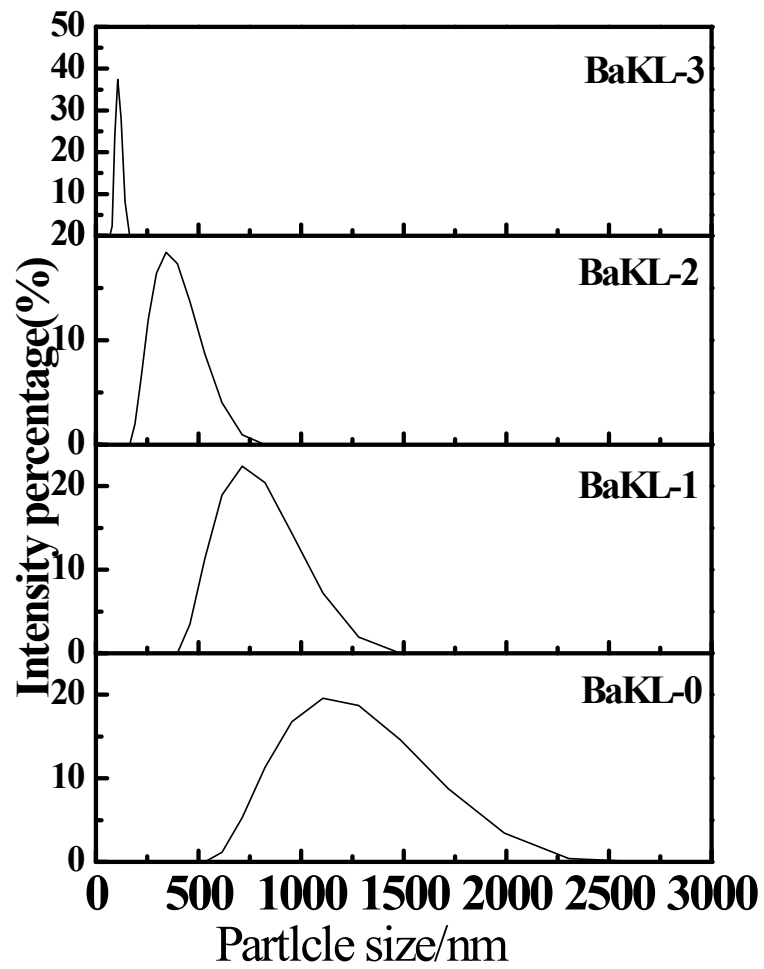

**Fig.S2.** Particle size distributions of different samples.

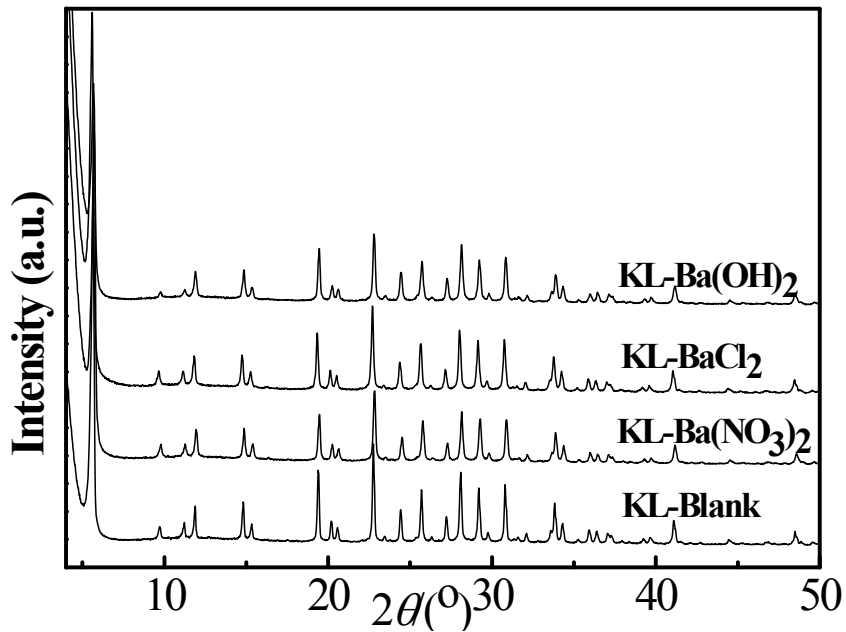

**Fig.S3.** XRD patterns of LTL-type zeolites with different Ba precursors.

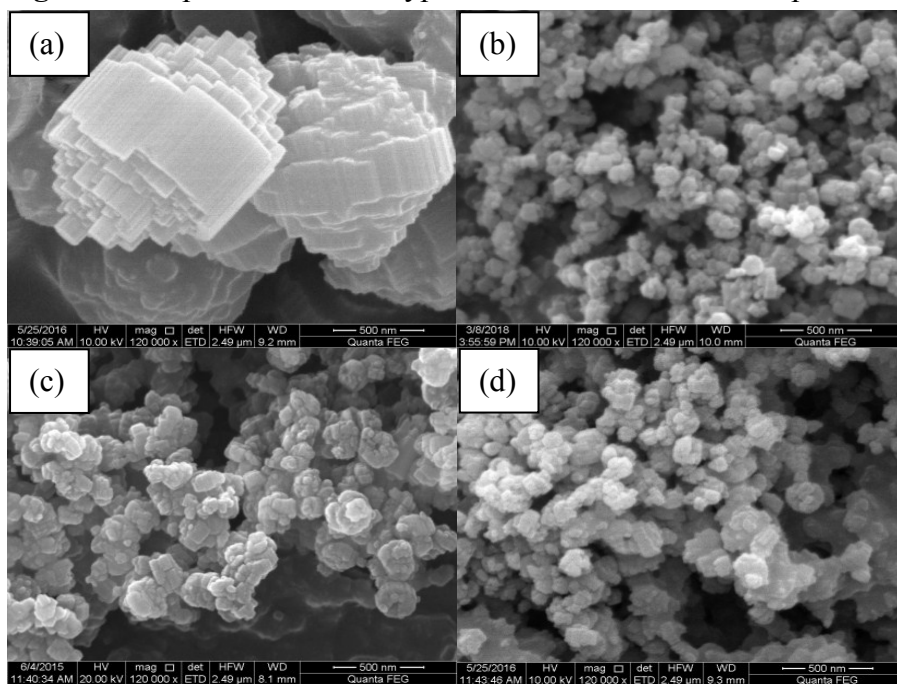

**Fig.S4.** SEM images of as-synthesized KL zeolites with different Ba precursors:  
 (a) KL-Blank, (b) KL- Ba(NO<sub>3</sub>)<sub>2</sub>, (c) KL-BaCl<sub>2</sub> and (d) KL- Ba(OH)<sub>2</sub>.

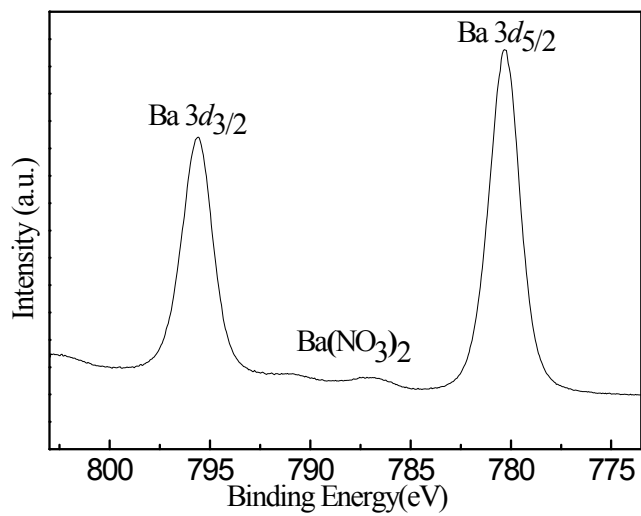

**Fig.S5.** XPS pattern of Ba3d for Ba(NO<sub>3</sub>)<sub>2</sub>.

**Table S1**Characteristic of Pt/BaKL catalysts.

| Cat.      | Precursor                                         | Pt content<br>(wt.%) <sup>a</sup> |
|-----------|---------------------------------------------------|-----------------------------------|
| Pt/BaKL-0 | Pt(NH <sub>3</sub> ) <sub>4</sub> Cl <sub>2</sub> | 0.49                              |
| Pt/BaKL-1 | Pt(NH <sub>3</sub> ) <sub>4</sub> Cl <sub>2</sub> | 0.48                              |
| Pt/BaKL-2 | Pt(NH <sub>3</sub> ) <sub>4</sub> Cl <sub>2</sub> | 0.48                              |
| Pt/BaKL-3 | Pt(NH <sub>3</sub> ) <sub>4</sub> Cl <sub>2</sub> | 0.49                              |

<sup>a</sup> Determined by ICP-AES.
